# Supplementary material for: Stochasticity in Protein Levels Drives Colinearity of Gene Order in Metabolic Operons of Escherichia coli
Source: PLoS Biol. 2009 May 26;7(5):e1000115. doi: 10.1371/journal.pbio.1000115 (PMC2684527; doi:10.1371/journal.pbio.1000115)
Supplement: Table S1 — Parameters and constants used in the mathematical models of metabolism and gene expression. (0.05 MB DOC) [file pbio.1000115.s004.doc]

**Supporting Table 1. Parameters and constants used in the mathematical models of metabolism and gene expression**

| **Process / Constant** | **Parameters** |
| --- | --- |
| Enzyme turnover number | *kcat* = 50 s-1, approximated value based on empirical value measured for *E. coli* aspartate kinase I (ref [1]) |
| *Km*of enzymes | *Km* = 1 mM, approximated value based on empirical value measured for *E. coli* aspartate kinase I (ref [1]) |
| Dilution rate | *D*= 0.00019254 s-1 (based on 60 minutes cell cycle time) |
| Protein degradation rate | *kdegr*= 6.42 * 10-5 s-1 (from ref [2]) |
| Protein dilution and degradation rate | = 0.00025674 s-1 ( *= D + kdegr*) |
| *E. coli* cell aqueous volume | *V* = 7 * 10-16 l (source : redpoll.pharmacy.ualberta.ca/CCDB/cgi-bin/STAT_NEW.cgi) |
| RNA polymerase binding to DNA (*f0*) and dissociation (*b0*) | *f0* = 0.42 s-1 (from ref [2]), see Fig 2., *b0* = 0.1 for highly expressed operons and *b0* = 1000 for lowly expressed operons |
| Transcription initiation rate | *k0* = 0.1 s-1 (from ref [2]), see Fig 2. |
| Formation (*v0*) and degradation (*mf0*) of ribosome binding site on mRNA | *v0* = 0.03 s-1, *mf0* = 0.114 s-1 (from ref [2]), see Fig 2. |
| Ribosome binding (*mf1*) and dissociation (*mb1*) | *mf 1*= 4 s-1, *mb1* = 0.4 s-1 (from ref [2]), see Fig 2. |
| Translation rates | *k1* = 0.3 s-1 (from ref [2]), *v1* = 0.017 s-1 (fine tuned to achieve approx. 60 s delays between the appearance of consecutive gene products), see Fig 2. |
|  |  |

**References**

1. Chassagnole C, Fell DA, Rais B, Kudla B, Mazat JP (2001) Control of the threonine-synthesis pathway in Escherichia coli: a theoretical and experimental approach. Biochem J 356: 433-444.

2. Swain PS (2004) Efficient attenuation of stochasticity in gene expression through post-transcriptional control. J Mol Biol 344: 965-976.
